# Supplementary material
Source: Springer Nature journal article supplement (https://www.springermedizin.de/resource/supplementary/12936_2004_117_MOESM3_ESM.pdf/9546924)

**Lactate  $\geq 10$   
mmol/L**

**Coma**

55  
(9%)

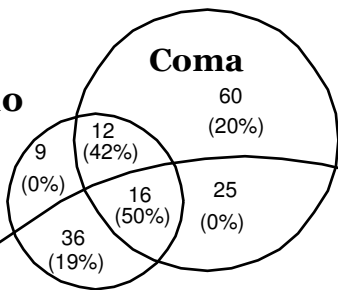

60  
(20%)

9  
(0%)

12  
(42%)

16  
(50%)

25  
(0%)

36  
(19%)

250  
(1%)

**Severe  
anaemia**

Supplement: MOESM3 [file 9546924]
